# Supplementary material for: New insights into the structure and catalytic performance of alizarin–zirconium hybrids for Meerwein–Ponndorf–Verley reductions: first-principles approach
Source: Royal Society of Chemistry journal article supplement (doi:10.1039/d1se00482d), 2021-01-01
Supplement: d1se00482d1.pdf [file d1se00482d1.pdf]

## Supporting Information

### **New insights into the structure and catalytic performance of alizarin-zirconium hybrids for Meerwein–Ponndorf–Verley reductions: first-principles approach**

Qingrui Peng <sup>a</sup>, Haijun Wang <sup>a\*</sup>, Xiaoning Li <sup>a</sup>, Xiang Wang <sup>a</sup>, Yehui Li <sup>a</sup>, Yongmei Xia <sup>a, b</sup>, Xiang Liu <sup>a</sup>

<sup>a</sup> School of Chemical and Materials Engineering, Jiangnan University, 1800 Lihu Avenue, Wuxi, Jiangsu 214122, China

<sup>b</sup> State Key Laboratory of Food Science and Technology, Jiangnan University, 1800 Lihu Avenue, Wuxi, Jiangsu 214122, China;

*<sup>a</sup> School of Chemical and Materials Engineering, Jiangnan University, 1800 Lihu Avenue, Wuxi, Jiangsu 214122, China*

*<sup>b</sup> State Key Laboratory of Food Science and Technology, Jiangnan University, 1800 Lihu Avenue, Wuxi, Jiangsu 214122, China;*

\*Corresponding author.

E-mail addresses: [wanghj329@jiangnan.edu.cn](mailto:wanghj329@jiangnan.edu.cn), Phone number: 86 0510-85917090

## Characterization

Scanning electron microscope (SEM) images were acquired on a Hitachi S-4800 Scanning Electron Microscope with an energy dispersive spectrometer (EDS) unit.

Transmission electron microscope (TEM) images were acquired on a JEM-2100plus Microscope operating at 200 kV.

Fourier transform infrared spectra (FT-IR) was collected on a Boman FTLA200-104.

X-ray diffraction (XRD) pattern was measured on XRD spectrometer (D8, Bruker AXS, Germany) with Cu K $\alpha$  radiation source over the  $2\theta$  range of 5-90°.

The X-ray photoelectron spectroscopy (XPS) measurement was carried out on an Axis supra spectrometer. N<sub>2</sub> adsorption-desorption isotherms were obtained using the Micromeritics ASAP 2020 (USA) surface area analyzer. The thermal property of solid samples was examined by thermogravimetry (TG) analysis on a Mettler-Toledo TGA-1100SF instrument under N<sub>2</sub> in a flow rate of 30 mL/min at a programmed temperature range of 50–700 °C with a heating ramp of 10 °C/min.

Diffuse reflectance UV–vis (UV–vis DRS) spectra of catalysts were measured on an UV–vis-near infrared light spectrophotometer (UV-3600 plus) with BaSO<sub>4</sub> as a reference.

Temperature-programmed reduction (TPR) and temperature programmed desorption (TPD) were performed on a BELCAT-B catalyst analyser connected with TCD. In detail, 95 mg of each vacuum-dried catalyst was heated was first heated at 323 K at a rate of 10 K min<sup>-1</sup> in a flow of 10 % H<sub>2</sub>/N<sub>2</sub> (30 mL min<sup>-1</sup>) for H<sub>2</sub>-TPR. For CO<sub>2</sub>-and NH<sub>3</sub>-TPD (temperature programmed desorption) testing, 95 mg of each vacuum-dried sample was first heated at 423 K for 2 h in a flow of Ar, and then the catalyst was kept at 423 K for 2 h. After that, the temperature was decreased to 323K. 10 vol % CO<sub>2</sub>/Ar or 10 vol % NH<sub>3</sub>/Ar (50 mL min<sup>-1</sup>) was adsorbed for 0.5 h, until the acid sites were saturated with CO<sub>2</sub> or NH<sub>3</sub>. The adsorbed CO<sub>2</sub> or NH<sub>3</sub> was removed by a flow of Ar (50 cm<sup>3</sup> min<sup>-1</sup>). When the baseline was stable, the temperature was increased from 323 K to 573 K at a rate of 10 K min<sup>-1</sup>.

Molar ratios of Lewis and Brønsted acid sites of the samples were measured by pyridine adsorption FT-IR fitted with a NEXUS 670 FT-IR spectrometer, based on the characteristic peak position and integral area in the wavenumber range of 1400-1700 cm<sup>-1</sup>.

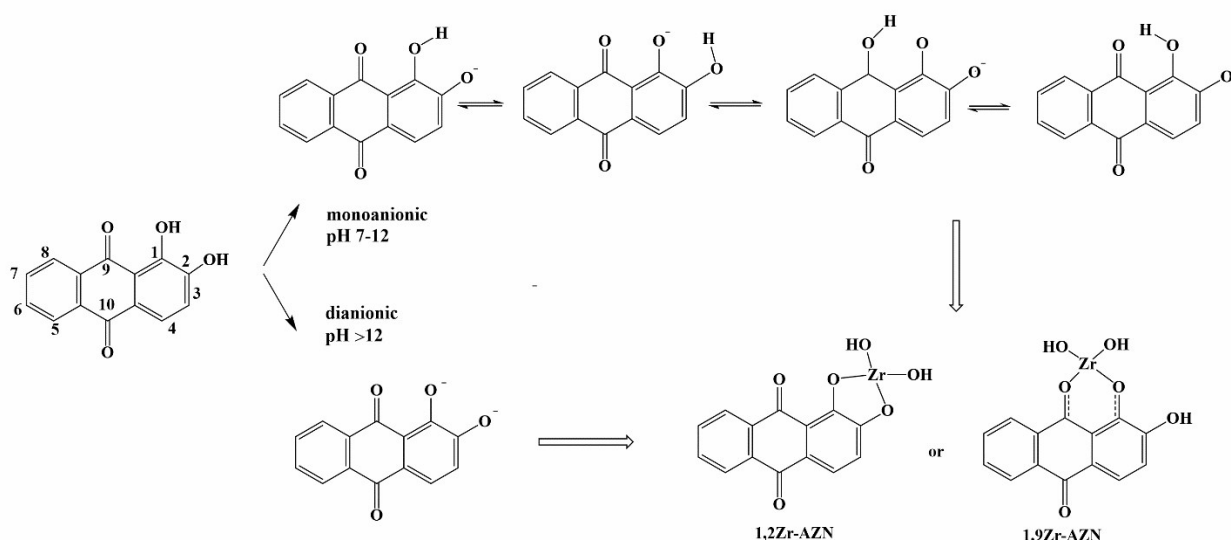

Fig. S1 Alizarin deprotonation and complexation paths in alkali media.

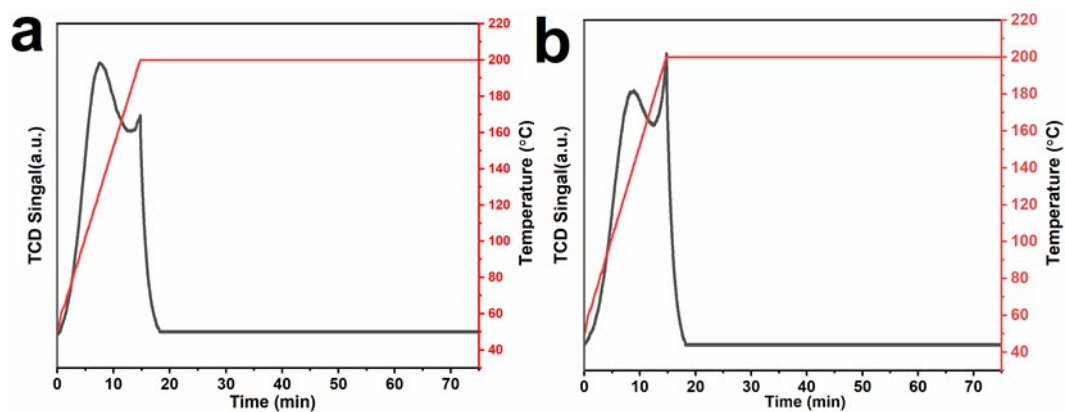

Fig. S2 (a)  $\text{NH}_3$ -TPD and (b)  $\text{CO}_2$ -TPD spectra for Zr-AZN

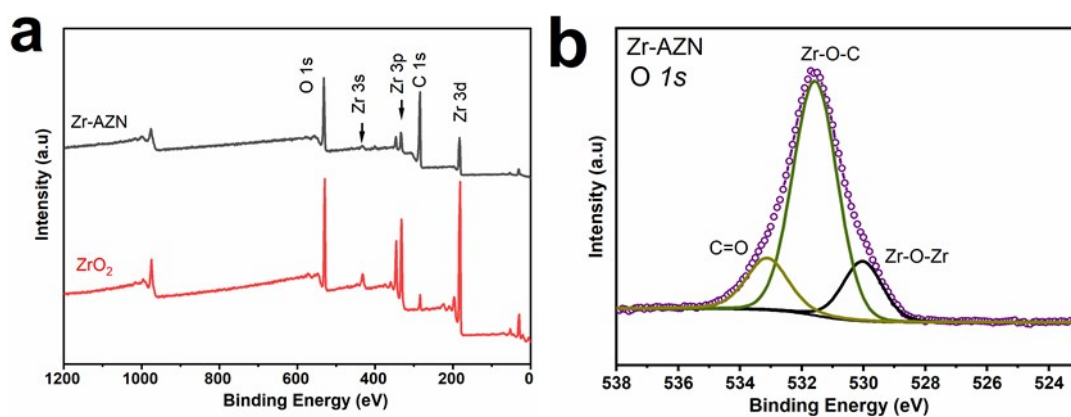

Fig. S3 XPS survey spectra of Zr-AZN and  $\text{ZrO}_2$ (a) and O 1s core energy levels (b), charge referenced to adventitious C1s peak at 284.8eV

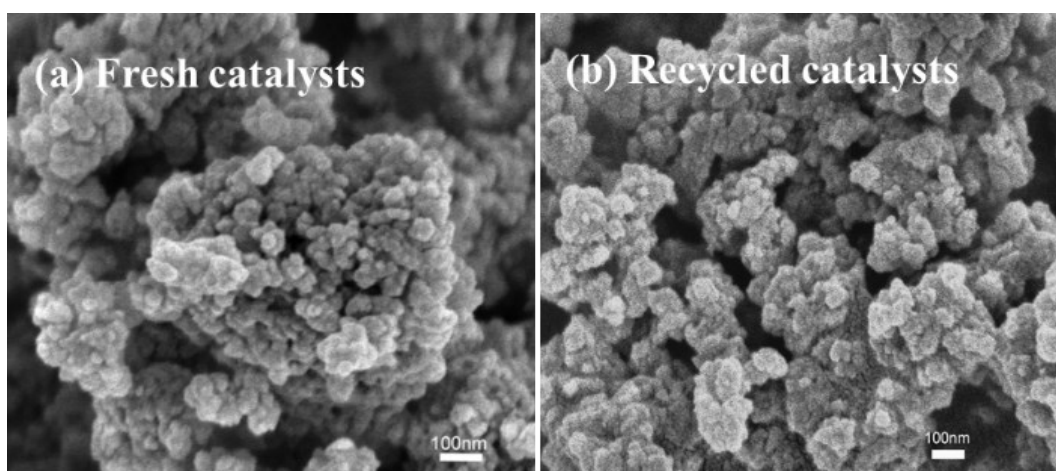

Fig. S4 SEM images of fresh (a) and recovered (b) Zr-AZN catalyst

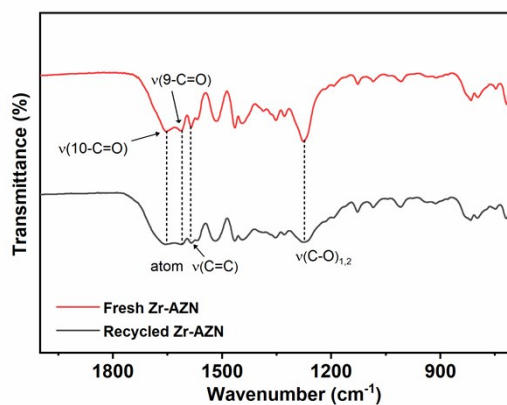

Fig. S5 Analyses of fresh and recovered Zr-LS catalyst after six cycles: FT-IR spectra.

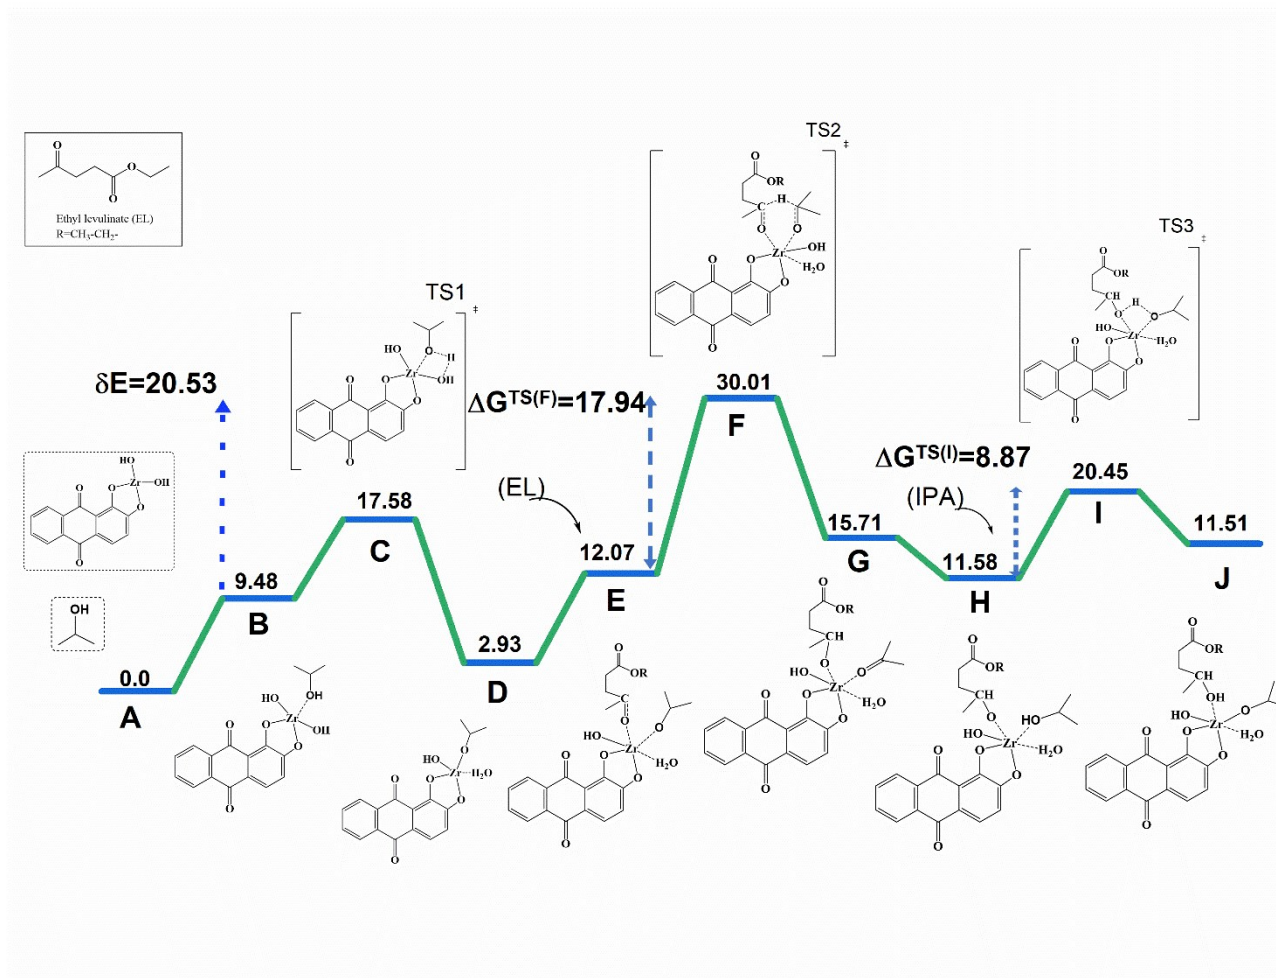

Fig. S6 Computed free energy for the liquid phase hydrogenation of EL to 4-HPE by Zr-AZN in IPA medium. The free energy/enthalpy corrections and solvation energies were computed at the B3LYP level of theory. All energies are referenced to Zr-AZN and EL in solution (A) and reported in kcal/mol. Note that an implicit solvation model for IPA is used in all steps, and an explicit IPA molecule is added at step D→E, in addition to the implicit solvation model.

Table S1 physicochemical properties of the prepared catalysts

| Sample              | Textural properties                                             |                                                                |                                     | Basicity (mmol/g) <sup>d</sup> | Acidity (mmol/g) <sup>d</sup> | Base/acid ratio |
|---------------------|-----------------------------------------------------------------|----------------------------------------------------------------|-------------------------------------|--------------------------------|-------------------------------|-----------------|
|                     | S <sub>BET</sub> (m <sup>2</sup> g <sup>-1</sup> ) <sup>a</sup> | V <sub>p</sub> (cm <sup>3</sup> g <sup>-1</sup> ) <sup>b</sup> | D <sub>mean</sub> (nm) <sup>c</sup> |                                |                               |                 |
| Zr-AZN              | 98.7                                                            | 0.43                                                           | 6.4                                 | 0.79                           | 0.58                          | 1:0.73          |
| UiO-66(Zr)          | 882                                                             | 0.38                                                           | 1.1                                 | 0.68                           | 0.39                          | 1:0.57          |
| ZrO <sub>2</sub>    | 25                                                              | 0.06                                                           | 0.6                                 | 0.18                           | 0.11                          | 1:0.61          |
| Zr-AZN <sup>e</sup> | 87.3                                                            | 0.22                                                           | 6.9                                 | 0.75                           | 0.54                          | 1:0.71          |

<sup>a</sup> BET surface area was obtained from N<sub>2</sub> adsorption isotherm.

<sup>b</sup> Volume of pores was estimated from BJH absorption cumulative volume of pores.

<sup>c</sup> Average pore size was estimated from the adsorption average pore diameter.

<sup>d</sup> Basicity and acidity of the catalysts were determined by CO<sub>2</sub>-and NH<sub>3</sub>-TPD, respectively, with a programmed temperature: heating from 50 to 200 °C at a rate of 10 °C/min and then kept at 200 °C for 60 min gas desorption.

<sup>e</sup> Recovered Zr-AZN in the sixth cycle.

**Optimized XYZ coordinates of Transition State (TS) structures;  
TS for the intra-molecular hydrogen transfer of Ethyl Levulinate (Fig.6, Fig.7 and Fig.8 of the  
main text)**

Zr-AZN<sub>1,2</sub>(TS1)

|    |             |             |             |
|----|-------------|-------------|-------------|
| C  | 5.90628600  | -2.42763400 | -0.16836400 |
| C  | 4.52229300  | -2.32855800 | -0.08949800 |
| C  | 3.89936300  | -1.07644700 | -0.10690000 |
| C  | 4.68406800  | 0.08322800  | -0.20639600 |
| C  | 6.07630400  | -0.02410900 | -0.28899700 |
| C  | 6.68619700  | -1.27215000 | -0.26914500 |
| C  | 2.40356500  | -1.01390400 | -0.01749800 |
| C  | 4.05446100  | 1.43319500  | -0.22195900 |
| C  | 2.58277800  | 1.50481500  | -0.10202300 |
| C  | 1.77796300  | 0.32685300  | -0.00634100 |
| C  | 0.38581700  | 0.48684700  | 0.10681000  |
| C  | -0.18241800 | 1.80007000  | 0.14346800  |
| C  | 0.61824800  | 2.92823400  | 0.04238700  |
| C  | 1.99767300  | 2.76854500  | -0.08149500 |
| H  | 6.38032500  | -3.40216100 | -0.15133700 |
| H  | 3.90212800  | -3.21236100 | -0.01205600 |
| H  | 6.66054600  | 0.88398300  | -0.36644800 |
| H  | 7.76550400  | -1.34893900 | -0.33095700 |
| H  | 0.16400900  | 3.91181600  | 0.06496700  |
| H  | 2.64514200  | 3.63217000  | -0.16014000 |
| O  | -0.51606500 | -0.48742700 | 0.18717700  |
| O  | 1.76191100  | -2.05569300 | 0.04767100  |
| O  | -1.50790500 | 1.82198600  | 0.27887300  |
| Zr | -2.54272900 | 0.00166200  | 0.43483200  |
| O  | -2.69503900 | -0.18249900 | 2.39045900  |
| H  | -2.09438700 | 0.00802100  | 3.11636500  |
| O  | -2.67738200 | -2.14810600 | -0.09097300 |
| H  | -1.93469100 | -2.56575000 | -0.53960900 |
| O  | 4.74919800  | 2.44147300  | -0.32602500 |
| C  | -6.37337300 | -1.17254200 | -0.12477000 |
| H  | -7.43960400 | -1.13582500 | -0.36430200 |
| H  | -6.21728700 | -0.65820400 | 0.82851000  |
| H  | -6.08874000 | -2.22051800 | -0.00237900 |
| C  | -5.55331200 | -0.51354700 | -1.23149600 |
| H  | -5.73107800 | -1.04861200 | -2.17181200 |
| C  | -5.90090200 | 0.95616500  | -1.43207100 |
| H  | -5.74144100 | 1.52206100  | -0.50896800 |
| H  | -5.28249500 | 1.39247400  | -2.21985400 |
| H  | -6.94981900 | 1.06542700  | -1.71960900 |
| O  | -4.14719600 | -0.63503900 | -0.95885900 |
| H  | -3.57919500 | -1.68199500 | -0.75651700 |

Zr-AZN<sub>1,2</sub>(TS2)

|    |             |             |             |
|----|-------------|-------------|-------------|
| C  | -7.15742300 | -3.14178600 | 1.27747100  |
| C  | -5.81658500 | -2.79196000 | 1.17320100  |
| C  | -5.43758900 | -1.62933100 | 0.49407100  |
| C  | -6.42404300 | -0.81538600 | -0.08449900 |
| C  | -7.77191700 | -1.17436300 | 0.02337600  |
| C  | -8.13877000 | -2.33060400 | 0.70062300  |
| C  | -3.97907000 | -1.28860700 | 0.40611400  |
| C  | -6.05633100 | 0.43172600  | -0.81381000 |
| C  | -4.62489800 | 0.77951500  | -0.89337300 |
| C  | -3.61390600 | -0.04717600 | -0.30727000 |
| C  | -2.27253000 | 0.35811600  | -0.42867600 |
| C  | -1.94450300 | 1.58104600  | -1.11245400 |
| C  | -2.94933300 | 2.36111600  | -1.67283300 |
| C  | -4.27759400 | 1.95243800  | -1.55971700 |
| H  | -7.44140000 | -4.04425800 | 1.80642200  |
| H  | -5.04209300 | -3.40755700 | 1.61251600  |
| H  | -8.51487600 | -0.53134000 | -0.43118400 |
| H  | -9.18475600 | -2.60291300 | 0.78141200  |
| H  | -2.68579700 | 3.27697600  | -2.18927700 |
| H  | -5.07258100 | 2.54789400  | -1.99005600 |
| O  | -1.21513800 | -0.28339900 | 0.04067100  |
| O  | -3.15819700 | -2.03833200 | 0.92434300  |
| O  | -0.65158500 | 1.88434400  | -1.14883500 |
| Zr | 0.72066400  | 0.53172400  | -0.23534800 |
| O  | 1.25098300  | -0.49932200 | -1.85141600 |
| H  | 0.72250000  | -0.85460100 | -2.57129100 |
| O  | -6.93086000 | 1.13291700  | -1.32078100 |
| C  | 4.40473600  | 2.77903800  | -0.63120900 |
| H  | 5.29635700  | 2.95627400  | -0.02765700 |
| H  | 4.25632400  | 3.64610400  | -1.28317800 |
| H  | 4.55097500  | 1.90303500  | -1.26183300 |
| C  | 3.16165300  | 2.62199000  | 0.23221000  |
| H  | 3.53128800  | 1.66516700  | 1.08420400  |
| C  | 2.87954500  | 3.78103400  | 1.17574000  |
| H  | 2.64000900  | 4.65834600  | 0.56595400  |
| H  | 2.02380800  | 3.56433200  | 1.81338000  |
| H  | 3.74944200  | 4.01986300  | 1.78963200  |
| O  | 2.12057900  | 2.09734800  | -0.37189100 |
| C  | 3.03065700  | 1.04178600  | 3.15685100  |
| H  | 3.87307100  | 1.62457500  | 3.53246400  |
| H  | 2.88346900  | 0.18423700  | 3.82137000  |
| H  | 2.12451900  | 1.64511100  | 3.17180400  |
| C  | 3.29914000  | 0.50532100  | 1.76034800  |
| C  | 4.63332800  | -0.22686800 | 1.61112400  |
| H  | 5.44928100  | 0.45246400  | 1.86945700  |

|   |             |             |             |
|---|-------------|-------------|-------------|
| H | 4.63753900  | -1.00820900 | 2.37976500  |
| C | 4.86506600  | -0.87292000 | 0.24946000  |
| H | 5.01411900  | -0.13584800 | -0.54076300 |
| H | 3.98826600  | -1.45812800 | -0.04383600 |
| O | 2.27811400  | -0.00434400 | 1.12212500  |
| C | 6.05217000  | -1.81172900 | 0.25053200  |
| O | 6.59599200  | -2.25550600 | 1.23707500  |
| O | 6.42403000  | -2.11474700 | -1.00336500 |
| C | 7.52965300  | -3.04766800 | -1.15543600 |
| H | 8.40593300  | -2.63057100 | -0.65525300 |
| H | 7.26558300  | -3.98271500 | -0.65747700 |
| C | 7.76057800  | -3.23994700 | -2.63918200 |
| H | 8.01653200  | -2.29352100 | -3.12050100 |
| H | 8.58671600  | -3.93823400 | -2.79359800 |
| H | 6.87064700  | -3.64835100 | -3.12293500 |
| O | -0.03482800 | 1.88102800  | 1.71722900  |
| H | -0.55553100 | 1.43122100  | 2.39493600  |
| H | -0.56081800 | 2.64307900  | 1.44224200  |

Zr-AZN<sub>1,2</sub>(TS3)

|    |             |             |             |
|----|-------------|-------------|-------------|
| C  | -7.74874500 | -2.30248900 | -0.57258500 |
| C  | -6.37272200 | -2.26295600 | -0.38200200 |
| C  | -5.69063700 | -1.04191000 | -0.39075700 |
| C  | -6.40747900 | 0.14790400  | -0.59377800 |
| C  | -7.79269700 | 0.10065500  | -0.78223500 |
| C  | -8.46159300 | -1.11701100 | -0.77257000 |
| C  | -4.20593700 | -1.04362000 | -0.17990900 |
| C  | -5.71289900 | 1.46661000  | -0.61403500 |
| C  | -4.24822600 | 1.47076300  | -0.42918800 |
| C  | -3.51311800 | 0.26202100  | -0.21807500 |
| C  | -2.12096900 | 0.35795600  | -0.05280100 |
| C  | -1.47135000 | 1.63530700  | -0.10221200 |
| C  | -2.21099600 | 2.79375800  | -0.30617000 |
| C  | -3.59241900 | 2.69941800  | -0.46733600 |
| H  | -8.26847800 | -3.25359400 | -0.56604100 |
| H  | -5.80379900 | -3.17030200 | -0.22456300 |
| H  | -8.32436600 | 1.03110400  | -0.93558700 |
| H  | -9.53484300 | -1.14703900 | -0.92055600 |
| H  | -1.70535200 | 3.75168400  | -0.33883100 |
| H  | -4.18733900 | 3.58934900  | -0.62751200 |
| O  | -1.28036300 | -0.64675500 | 0.15906800  |
| O  | -3.62835300 | -2.10824300 | 0.01168100  |
| O  | -0.15306300 | 1.60581500  | 0.07136400  |
| Zr | 0.78275000  | -0.27260600 | 0.34116800  |
| O  | 1.30928800  | -0.76776700 | -1.49631400 |
| H  | 0.89936600  | -0.98318400 | -2.33718000 |



|   |             |             |             |
|---|-------------|-------------|-------------|
| O | -6.35386500 | 2.50218700  | -0.78306600 |
| H | 3.98205200  | -2.42748000 | 2.19609600  |
| C | 2.47822900  | -3.65263700 | 1.27766700  |
| H | 3.10775700  | -4.54448400 | 1.22339300  |
| H | 1.81730600  | -3.64771000 | 0.40532700  |
| H | 1.86255900  | -3.72138200 | 2.17756800  |
| C | 3.33190100  | -2.38844100 | 1.31199700  |
| C | 4.21001900  | -2.25786400 | 0.06173600  |
| H | 4.78423100  | -3.18164800 | -0.05572700 |
| H | 3.56281800  | -2.16956700 | -0.81606400 |
| C | 5.17224000  | -1.07171900 | 0.11620300  |
| H | 5.82421800  | -1.13749600 | 0.99547700  |
| H | 4.63672900  | -0.12383000 | 0.20873400  |
| O | 2.47321900  | -1.24980200 | 1.48403100  |
| C | 6.06900600  | -0.96533700 | -1.09754500 |
| O | 6.16188900  | -1.78482600 | -1.98356700 |
| O | 6.77487800  | 0.18012200  | -1.07070000 |
| C | 7.69404000  | 0.41502400  | -2.17146700 |
| H | 8.40921100  | -0.40920300 | -2.21085000 |
| H | 7.12619100  | 0.41755900  | -3.10413700 |
| C | 8.37419500  | 1.74421200  | -1.91899800 |
| H | 8.92973000  | 1.72584600  | -0.97873300 |
| H | 9.07629400  | 1.95726500  | -2.72873000 |
| H | 7.64329400  | 2.55476700  | -1.87656400 |
| C | 2.82388700  | 3.25913600  | 0.36881900  |
| H | 3.18244200  | 4.23812100  | 0.69878600  |
| H | 1.81231900  | 3.36814600  | -0.02677000 |
| H | 3.47762400  | 2.90604800  | -0.43225800 |
| C | 2.82844400  | 2.27494100  | 1.53284100  |
| H | 3.85701300  | 2.15332400  | 1.89132000  |
| C | 1.94900200  | 2.72293400  | 2.69668900  |
| H | 0.91681900  | 2.85353600  | 2.36454200  |
| H | 1.96599700  | 1.98407100  | 3.50136000  |
| H | 2.31068100  | 3.67373500  | 3.09833500  |
| O | 2.42124000  | 0.97743600  | 1.05655300  |
| H | 2.81872900  | -0.06539400 | 1.45646300  |
| O | 0.06889500  | -0.36614900 | 2.60737400  |
| H | 0.69196500  | -0.84426200 | 3.17139900  |
| H | -0.81833400 | -0.68979500 | 2.80746600  |

Zr-AZN<sub>1,9</sub>(TS1)

|    |             |             |             |
|----|-------------|-------------|-------------|
| Zr | 1.94383300  | -0.66925300 | 0.56546400  |
| C  | -2.81189900 | -3.31251400 | -0.57130900 |
| C  | -3.55562200 | -2.14335200 | -0.59155300 |
| C  | -2.97280600 | -0.90226300 | -0.31141800 |
| C  | -1.57835100 | -0.82675800 | 0.00816000  |

|   |             |             |             |
|---|-------------|-------------|-------------|
| C | -0.82315200 | -2.03014500 | 0.00347300  |
| C | -1.44737200 | -3.25455500 | -0.27946400 |
| C | -3.80794500 | 0.30497900  | -0.36576100 |
| C | -0.98935200 | 0.43666600  | 0.32805900  |
| C | -1.76583200 | 1.63874500  | 0.27796700  |
| C | -3.14404600 | 1.58734100  | -0.07117400 |
| C | -3.88251400 | 2.77877100  | -0.13783100 |
| H | -4.92888000 | 2.71084400  | -0.40894500 |
| C | -3.29073000 | 4.00075800  | 0.13206800  |
| C | -1.92965600 | 4.05458400  | 0.48507100  |
| C | -1.18019100 | 2.89736000  | 0.55946900  |
| H | -3.26210500 | -4.27404300 | -0.78724300 |
| H | -4.61144500 | -2.16530100 | -0.82853900 |
| H | -3.87213400 | 4.91346400  | 0.07200000  |
| H | -1.46557600 | 5.01113200  | 0.69778300  |
| H | -0.13302700 | 2.93474200  | 0.82919800  |
| O | 0.29297900  | 0.52733700  | 0.67876800  |
| O | 0.50118000  | -2.09255900 | 0.24344900  |
| O | -5.01534100 | 0.25407600  | -0.65242100 |
| O | 2.48744100  | -0.92643500 | 2.46071400  |
| H | 1.96169000  | -1.01263900 | 3.26125200  |
| O | 3.10928400  | -1.68535400 | -1.06129800 |
| H | 2.66639400  | -2.19017800 | -1.75090600 |
| O | -0.70242600 | -4.38915500 | -0.27173500 |
| H | 0.20305100  | -4.11809200 | -0.04927900 |
| C | 4.52615000  | 2.04890200  | -2.12705400 |
| H | 5.29513800  | 2.82394300  | -2.06871100 |
| H | 3.68034800  | 2.43988600  | -2.69939400 |
| H | 4.94416400  | 1.19446000  | -2.66506500 |
| C | 4.07611800  | 1.63940300  | -0.72929200 |
| H | 4.93763700  | 1.23943800  | -0.17917900 |
| C | 3.47485300  | 2.79520700  | 0.06108700  |
| H | 2.61343400  | 3.21208000  | -0.46813000 |
| H | 3.14498400  | 2.46096400  | 1.04866600  |
| H | 4.21329300  | 3.58879700  | 0.20090800  |
| O | 3.09447000  | 0.59060700  | -0.84372100 |
| H | 3.33311100  | -0.50629300 | -1.27599800 |

Zr-AZN<sub>1,9</sub>(TS2)

|    |             |             |            |
|----|-------------|-------------|------------|
| Zr | -0.32316900 | -1.74477100 | 0.92240400 |
| C  | 1.25722400  | 3.65293400  | 1.16671000 |
| C  | 2.51269800  | 3.40355800  | 0.63490000 |
| C  | 2.91892300  | 2.10528700  | 0.30471700 |
| C  | 2.02674300  | 1.00075600  | 0.51222900 |
| C  | 0.74649300  | 1.26523200  | 1.07625100 |
| C  | 0.38265900  | 2.58820500  | 1.38285800 |

|   |             |             |             |
|---|-------------|-------------|-------------|
| C | 4.26315300  | 1.90812800  | -0.25147400 |
| C | 2.43609100  | -0.32556300 | 0.15794600  |
| C | 3.74617300  | -0.55463200 | -0.38350900 |
| C | 4.64848400  | 0.52728100  | -0.58100200 |
| C | 5.92847500  | 0.27145200  | -1.10092400 |
| H | 6.59466500  | 1.11428400  | -1.23843000 |
| C | 6.32371800  | -1.01389400 | -1.42474600 |
| C | 5.43145000  | -2.08695000 | -1.23518300 |
| C | 4.16844600  | -1.86313200 | -0.72596500 |
| H | 0.93896500  | 4.65686100  | 1.42217300  |
| H | 3.21121400  | 4.21217200  | 0.46343900  |
| H | 7.31511300  | -1.19642800 | -1.82332400 |
| H | 5.73890300  | -3.09515900 | -1.49016500 |
| H | 3.47888400  | -2.68383100 | -0.57826600 |
| O | 1.64124000  | -1.36752600 | 0.32473600  |
| O | -0.18154500 | 0.33736100  | 1.35017500  |
| O | 5.04480800  | 2.85951700  | -0.43522200 |
| O | -0.02895900 | -3.59191600 | 1.62527600  |
| H | 0.37736800  | -3.93510700 | 2.42516300  |
| O | -0.77033100 | -1.41769700 | 3.22011200  |
| H | -0.96034800 | -0.49821100 | 3.44638900  |
| O | -0.85495400 | 2.81145300  | 1.90684400  |
| H | -1.26234900 | 1.93303300  | 1.98732700  |
| C | -1.81044900 | -1.71534800 | -3.14917000 |
| H | -2.78757100 | -1.77327400 | -3.63073900 |
| H | -1.06339000 | -2.11205900 | -3.84451500 |
| H | -1.55958400 | -0.67670200 | -2.93950700 |
| C | -1.75827300 | -2.55127400 | -1.88085800 |
| H | -2.83940500 | -2.09135300 | -1.21216100 |
| C | -2.10849600 | -4.01992800 | -2.04630700 |
| H | -1.31919400 | -4.48612100 | -2.64488400 |
| H | -2.14259600 | -4.52497700 | -1.08101900 |
| H | -3.05699200 | -4.15261100 | -2.56839800 |
| O | -0.77082800 | -2.28706300 | -1.06150100 |
| H | -1.36140600 | -1.98482600 | 3.72988800  |
| C | -4.40689700 | -2.81891100 | 0.16223400  |
| H | -5.08068800 | -2.96628300 | -0.68321200 |
| H | -5.00787800 | -2.56231700 | 1.04020400  |
| H | -3.87501400 | -3.74616800 | 0.37409900  |
| C | -3.42977600 | -1.68030100 | -0.08905100 |
| C | -4.09242200 | -0.36684100 | -0.51533500 |
| H | -4.71200900 | -0.54072400 | -1.39862800 |
| H | -4.78298700 | -0.10824800 | 0.29553600  |
| C | -3.13785100 | 0.80357300  | -0.73428400 |
| H | -2.65343700 | 0.77070700  | -1.71087400 |
| H | -2.33196400 | 0.78084400  | 0.00621700  |

|   |             |             |             |
|---|-------------|-------------|-------------|
| O | -2.43611900 | -1.58797000 | 0.76037300  |
| C | -3.81377900 | 2.15001100  | -0.58752200 |
| O | -4.88347300 | 2.34686400  | -0.05535700 |
| O | -3.04625500 | 3.12496600  | -1.09824900 |
| C | -3.52268600 | 4.49031200  | -0.94167200 |
| H | -4.50344400 | 4.57251600  | -1.41396500 |
| H | -3.63750800 | 4.69395900  | 0.12481800  |
| C | -2.50220000 | 5.40410400  | -1.58601300 |
| H | -2.39419300 | 5.18098900  | -2.64971900 |
| H | -2.82546200 | 6.44291500  | -1.48404800 |
| H | -1.52701700 | 5.29868700  | -1.10601400 |

Zr-AZN<sub>1,9</sub>(TS3)

|    |             |             |             |
|----|-------------|-------------|-------------|
| Zr | -0.32316900 | -1.74477100 | 0.92240400  |
| C  | 1.25722400  | 3.65293400  | 1.16671000  |
| C  | 2.51269800  | 3.40355800  | 0.63490000  |
| C  | 2.91892300  | 2.10528700  | 0.30471700  |
| C  | 2.02674300  | 1.00075600  | 0.51222900  |
| C  | 0.74649300  | 1.26523200  | 1.07625100  |
| C  | 0.38265900  | 2.58820500  | 1.38285800  |
| C  | 4.26315300  | 1.90812800  | -0.25147400 |
| C  | 2.43609100  | -0.32556300 | 0.15794600  |
| C  | 3.74617300  | -0.55463200 | -0.38350900 |
| C  | 4.64848400  | 0.52728100  | -0.58100200 |
| C  | 5.92847500  | 0.27145200  | -1.10092400 |
| H  | 6.59466500  | 1.11428400  | -1.23843000 |
| C  | 6.32371800  | -1.01389400 | -1.42474600 |
| C  | 5.43145000  | -2.08695000 | -1.23518300 |
| C  | 4.16844600  | -1.86313200 | -0.72596500 |
| H  | 0.93896500  | 4.65686100  | 1.42217300  |
| H  | 3.21121400  | 4.21217200  | 0.46343900  |
| H  | 7.31511300  | -1.19642800 | -1.82332400 |
| H  | 5.73890300  | -3.09515900 | -1.49016500 |
| H  | 3.47888400  | -2.68383100 | -0.57826600 |
| O  | 1.64124000  | -1.36752600 | 0.32473600  |
| O  | -0.18154500 | 0.33736100  | 1.35017500  |
| O  | 5.04480800  | 2.85951700  | -0.43522200 |
| O  | -0.02895900 | -3.59191600 | 1.62527600  |
| H  | 0.37736800  | -3.93510700 | 2.42516300  |
| O  | -0.77033100 | -1.41769700 | 3.22011200  |
| H  | -0.96034800 | -0.49821100 | 3.44638900  |
| O  | -0.85495400 | 2.81145300  | 1.90684400  |
| H  | -1.26234900 | 1.93303300  | 1.98732700  |
| C  | -1.81044900 | -1.71534800 | -3.14917000 |
| H  | -2.78757100 | -1.77327400 | -3.63073900 |
| H  | -1.06339000 | -2.11205900 | -3.84451500 |

|                         |             |             |             |
|-------------------------|-------------|-------------|-------------|
| H                       | -1.55958400 | -0.67670200 | -2.93950700 |
| C                       | -1.75827300 | -2.55127400 | -1.88085800 |
| H                       | -2.83940500 | -2.09135300 | -1.21216100 |
| C                       | -2.10849600 | -4.01992800 | -2.04630700 |
| H                       | -1.31919400 | -4.48612100 | -2.64488400 |
| H                       | -2.14259600 | -4.52497700 | -1.08101900 |
| H                       | -3.05699200 | -4.15261100 | -2.56839800 |
| O                       | -0.77082800 | -2.28706300 | -1.06150100 |
| H                       | -1.36140600 | -1.98482600 | 3.72988800  |
| C                       | -4.40689700 | -2.81891100 | 0.16223400  |
| H                       | -5.08068800 | -2.96628300 | -0.68321200 |
| H                       | -5.00787800 | -2.56231700 | 1.04020400  |
| H                       | -3.87501400 | -3.74616800 | 0.37409900  |
| C                       | -3.42977600 | -1.68030100 | -0.08905100 |
| C                       | -4.09242200 | -0.36684100 | -0.51533500 |
| H                       | -4.71200900 | -0.54072400 | -1.39862800 |
| H                       | -4.78298700 | -0.10824800 | 0.29553600  |
| C                       | -3.13785100 | 0.80357300  | -0.73428400 |
| H                       | -2.65343700 | 0.77070700  | -1.71087400 |
| H                       | -2.33196400 | 0.78084400  | 0.00621700  |
| O                       | -2.43611900 | -1.58797000 | 0.76037300  |
| C                       | -3.81377900 | 2.15001100  | -0.58752200 |
| O                       | -4.88347300 | 2.34686400  | -0.05535700 |
| O                       | -3.04625500 | 3.12496600  | -1.09824900 |
| C                       | -3.52268600 | 4.49031200  | -0.94167200 |
| H                       | -4.50344400 | 4.57251600  | -1.41396500 |
| H                       | -3.63750800 | 4.69395900  | 0.12481800  |
| C                       | -2.50220000 | 5.40410400  | -1.58601300 |
| H                       | -2.39419300 | 5.18098900  | -2.64971900 |
| H                       | -2.82546200 | 6.44291500  | -1.48404800 |
| H                       | -1.52701700 | 5.29868700  | -1.10601400 |
| Sn <sub>1,2</sub> (TS1) |             |             |             |
| C                       | 6.11547100  | -2.07838700 | -0.53417100 |
| C                       | 4.73734300  | -2.11425000 | -0.35827700 |
| C                       | 4.01055800  | -0.92756300 | -0.21951100 |
| C                       | 4.68416400  | 0.30315900  | -0.25912300 |
| C                       | 6.07114100  | 0.33203400  | -0.43679500 |
| C                       | 6.78476800  | -0.85209500 | -0.57380700 |
| C                       | 2.52587400  | -1.01166300 | -0.03389100 |
| C                       | 3.93932500  | 1.58348600  | -0.11453400 |
| C                       | 2.47205600  | 1.50880100  | 0.07062600  |
| C                       | 1.78180600  | 0.26388300  | 0.11351700  |
| C                       | 0.38675200  | 0.27404500  | 0.29373400  |
| C                       | -0.30524900 | 1.51960400  | 0.42696000  |
| C                       | 0.39591600  | 2.71881300  | 0.38044400  |
| C                       | 1.77444900  | 2.70655000  | 0.20393500  |

|                         |             |             |             |
|-------------------------|-------------|-------------|-------------|
| H                       | 6.67077100  | -3.00294800 | -0.64089700 |
| H                       | 4.20239000  | -3.05461400 | -0.32566500 |
| H                       | 6.56927300  | 1.29275000  | -0.46470700 |
| H                       | 7.85936300  | -0.82421600 | -0.71133600 |
| H                       | -0.15045800 | 3.64839000  | 0.48376600  |
| H                       | 2.33192500  | 3.63316600  | 0.16663900  |
| O                       | -0.35285700 | -0.84622100 | 0.34564400  |
| O                       | 1.98313200  | -2.10813800 | -0.01147800 |
| O                       | -1.63635000 | 1.49855600  | 0.59839000  |
| O                       | -3.32399700 | -0.68313200 | 2.32870200  |
| H                       | -3.16753900 | 0.07224000  | 2.91087300  |
| O                       | -2.92086300 | -2.34384400 | -0.19212700 |
| H                       | -2.22700900 | -2.83050200 | -0.65570300 |
| O                       | 4.53103600  | 2.65837400  | -0.14893400 |
| C                       | -4.73208000 | 1.83099100  | -1.27698300 |
| H                       | -5.68174800 | 2.36826200  | -1.33667700 |
| H                       | -4.16508200 | 2.02162600  | -2.19183200 |
| H                       | -4.16729100 | 2.23084600  | -0.43178700 |
| C                       | -4.98794100 | 0.34082400  | -1.11382900 |
| H                       | -5.55109500 | 0.15846700  | -0.19290900 |
| C                       | -5.72387100 | -0.27749000 | -2.29362600 |
| H                       | -5.15825300 | -0.12908800 | -3.21703500 |
| H                       | -5.87566700 | -1.34870700 | -2.14242200 |
| H                       | -6.70423500 | 0.19200800  | -2.40663300 |
| O                       | -3.70270500 | -0.34363100 | -1.00000300 |
| H                       | -3.55679000 | -1.55067000 | -0.88487400 |
| Sn                      | -2.34861200 | -0.44514400 | 0.62063300  |
| Sn <sub>1,2</sub> (TS2) |             |             |             |
| C                       | -7.52113400 | -0.81813700 | 0.97895300  |
| C                       | -6.20688700 | -1.21429900 | 0.76180900  |
| C                       | -5.23728300 | -0.27904000 | 0.38569700  |
| C                       | -5.60195700 | 1.06755500  | 0.22913900  |
| C                       | -6.92663500 | 1.45920100  | 0.44942400  |
| C                       | -7.88281900 | 0.52281600  | 0.82217200  |
| C                       | -3.83110100 | -0.74957700 | 0.15955200  |
| C                       | -4.59482400 | 2.09075900  | -0.16946100 |
| C                       | -3.21024300 | 1.63291300  | -0.39885200 |
| C                       | -2.83333700 | 0.26392700  | -0.24485600 |
| C                       | -1.49488300 | -0.09932800 | -0.48501500 |
| C                       | -0.53901100 | 0.90216600  | -0.87604300 |
| C                       | -0.93877600 | 2.22632500  | -1.01225100 |
| C                       | -2.26421100 | 2.58158500  | -0.77563700 |
| H                       | -8.26555000 | -1.55033900 | 1.26964900  |
| H                       | -5.90834400 | -2.24825300 | 0.87787700  |
| H                       | -7.18393400 | 2.50305900  | 0.32221700  |
| H                       | -8.90774400 | 0.83224800  | 0.99091100  |

|    |             |             |             |
|----|-------------|-------------|-------------|
| H  | -0.20327900 | 2.96659500  | -1.30409400 |
| H  | -2.58338100 | 3.61024300  | -0.88202500 |
| O  | -1.03792000 | -1.33930400 | -0.37380900 |
| O  | -3.56557300 | -1.93725700 | 0.31554300  |
| O  | 0.72041200  | 0.52088400  | -1.09651300 |
| O  | 1.02107300  | -2.25376500 | -2.66062400 |
| H  | 0.55013700  | -3.09609200 | -2.64124200 |
| O  | 0.03413700  | -3.69267900 | -0.38272900 |
| H  | -0.84782700 | -3.39152200 | -0.10496800 |
| O  | -4.92287500 | 3.26861500  | -0.29820700 |
| C  | 2.71265200  | -1.00534500 | 3.15164600  |
| H  | 3.72879100  | -1.11869400 | 3.53063500  |
| H  | 2.01745000  | -1.31314300 | 3.93928600  |
| H  | 2.51535300  | 0.03881900  | 2.91489700  |
| C  | 2.46060500  | -1.89233900 | 1.94415300  |
| H  | 3.47985600  | -1.51391800 | 1.14890900  |
| C  | 2.76639400  | -3.36749300 | 2.12965600  |
| H  | 1.99158300  | -3.78298000 | 2.78157900  |
| H  | 2.73937700  | -3.90898700 | 1.18329400  |
| H  | 3.73541500  | -3.52508700 | 2.60333800  |
| O  | 1.36880200  | -1.59279200 | 1.27078700  |
| H  | 0.35101000  | -4.29822100 | 0.29867400  |
| C  | 5.07993100  | -2.38473100 | -0.06230600 |
| H  | 5.74692900  | -2.37596400 | 0.80100500  |
| H  | 5.67976300  | -2.23075000 | -0.96405600 |
| H  | 4.59478800  | -3.35677700 | -0.14382500 |
| C  | 4.05229100  | -1.26313800 | 0.00575800  |
| C  | 4.66113800  | 0.12257600  | 0.24443500  |
| H  | 5.25935900  | 0.10081700  | 1.15869900  |
| H  | 5.36987000  | 0.27436600  | -0.57730800 |
| C  | 3.67638800  | 1.28726600  | 0.26050600  |
| H  | 3.07971900  | 1.31814200  | 1.17381700  |
| H  | 2.95867500  | 1.19947900  | -0.56014900 |
| O  | 3.10027500  | -1.33929000 | -0.90951600 |
| C  | 4.36786800  | 2.62421300  | 0.10671400  |
| O  | 5.50611500  | 2.78827100  | -0.27234200 |
| O  | 3.53877300  | 3.63122400  | 0.42576200  |
| C  | 4.05615600  | 4.98229900  | 0.27501500  |
| H  | 4.95007600  | 5.08215500  | 0.89373400  |
| H  | 4.34518500  | 5.12839900  | -0.76769200 |
| C  | 2.96198200  | 5.93831600  | 0.69982900  |
| H  | 2.68038000  | 5.77140300  | 1.74182000  |
| H  | 3.31634700  | 6.96717400  | 0.60042000  |
| H  | 2.07440700  | 5.81910600  | 0.07475600  |
| Sn | 1.00712000  | -1.52207000 | -0.79974400 |

Sn<sub>1,2</sub>(TS3)

|   |             |             |             |
|---|-------------|-------------|-------------|
| C | -6.97533100 | -3.14366000 | 0.36788500  |
| C | -5.63174100 | -2.79477800 | 0.43449500  |
| C | -5.20905000 | -1.52357500 | 0.03245600  |
| C | -6.15453400 | -0.60047100 | -0.43989400 |
| C | -7.50544300 | -0.95767900 | -0.50385500 |
| C | -7.91570700 | -2.22273300 | -0.10245900 |
| C | -3.74941800 | -1.18902600 | 0.12151800  |
| C | -5.73695700 | 0.75995700  | -0.87524700 |
| C | -4.29828100 | 1.09482700  | -0.79597300 |
| C | -3.32978700 | 0.16220000  | -0.32037600 |
| C | -1.97468300 | 0.55049100  | -0.28002600 |
| C | -1.60326100 | 1.87180100  | -0.71086900 |
| C | -2.57484300 | 2.75736000  | -1.16320100 |
| C | -3.90832000 | 2.36653700  | -1.20584400 |
| H | -7.29320400 | -4.13136600 | 0.68111900  |
| H | -4.89002000 | -3.49520200 | 0.79608300  |
| H | -8.21582000 | -0.22815200 | -0.87142700 |
| H | -8.96350300 | -2.49477200 | -0.15434900 |
| H | -2.26904300 | 3.74648900  | -1.48252800 |
| H | -4.66960500 | 3.04872100  | -1.56072800 |
| O | -0.99720400 | -0.25434600 | 0.14412000  |
| O | -2.96991800 | -2.03060600 | 0.55079000  |
| O | -0.31233600 | 2.23012700  | -0.66775800 |
| O | 1.66037800  | -0.19482100 | -1.51904300 |
| H | 0.97081100  | -0.67076700 | -1.99850200 |
| O | -6.56853400 | 1.56641600  | -1.28413800 |
| H | 2.99671800  | -1.64400100 | 2.77097700  |
| C | 1.12477000  | -2.49182000 | 2.14426100  |
| H | 1.39441800  | -3.52049400 | 2.39450600  |
| H | 0.46708800  | -2.51263200 | 1.27065300  |
| H | 0.56805000  | -2.06849800 | 2.98287100  |
| C | 2.37690600  | -1.67090500 | 1.86715700  |
| C | 3.20468600  | -2.22869600 | 0.70958200  |
| H | 3.41810500  | -3.27849900 | 0.92927500  |
| H | 2.60753300  | -2.20594400 | -0.20570400 |
| C | 4.52044100  | -1.48614800 | 0.48040800  |
| H | 5.10984000  | -1.43855700 | 1.40393600  |
| H | 4.35204000  | -0.45107400 | 0.17338400  |
| O | 1.98082100  | -0.28840700 | 1.65923400  |
| C | 5.39277400  | -2.13887300 | -0.56969900 |
| O | 5.18647700  | -3.21207100 | -1.08993800 |
| O | 6.45784700  | -1.36920200 | -0.85473900 |
| C | 7.39827200  | -1.88576600 | -1.83546800 |
| H | 7.77318300  | -2.84935900 | -1.48435100 |
| H | 6.86580100  | -2.04963100 | -2.77448500 |
| C | 8.50713600  | -0.86548800 | -1.98328300 |



|                               |             |             |             |
|-------------------------------|-------------|-------------|-------------|
| H                             | 9.02239900  | -0.70861600 | -1.03305500 |
| H                             | 9.23683500  | -1.22033700 | -2.71515100 |
| H                             | 8.11249300  | 0.09253700  | -2.32879000 |
| C                             | 2.78035200  | 3.81971900  | -0.34159700 |
| H                             | 3.23759600  | 4.80798700  | -0.25072900 |
| H                             | 1.69362800  | 3.93994600  | -0.32700100 |
| H                             | 3.07117000  | 3.39412900  | -1.30450700 |
| C                             | 3.24132200  | 2.92414900  | 0.79899000  |
| H                             | 4.32744100  | 2.79843300  | 0.73720900  |
| C                             | 2.87771500  | 3.45968100  | 2.17815500  |
| H                             | 1.79818800  | 3.58725400  | 2.27776100  |
| H                             | 3.22049000  | 2.77900500  | 2.96171300  |
| H                             | 3.36182900  | 4.42699500  | 2.33733200  |
| O                             | 2.71476200  | 1.58670900  | 0.59194300  |
| H                             | 2.71873600  | 0.63938600  | 1.36610200  |
| O                             | 0.14350900  | 1.59009900  | 2.17191100  |
| H                             | 0.49933700  | 0.97968900  | 2.83461300  |
| H                             | -0.80712200 | 1.66081100  | 2.33063500  |
| Sn                            | 0.85552100  | 0.69345400  | 0.09162800  |
| Zr-AZN <sub>1,2</sub> (TS2'') |             |             |             |
| C                             | 6.10472000  | 2.08920800  | 1.44979400  |
| C                             | 4.72278900  | 1.94499500  | 1.42253700  |
| C                             | 4.12969700  | 0.94585400  | 0.64396900  |
| C                             | 4.94219200  | 0.08343400  | -0.10908100 |
| C                             | 6.33249400  | 0.23350500  | -0.07533500 |
| C                             | 6.91250500  | 1.23146100  | 0.69796100  |
| C                             | 2.63494900  | 0.82934500  | 0.63675400  |
| C                             | 4.34472100  | -0.99317200 | -0.94948900 |
| C                             | 2.87217900  | -1.09210500 | -0.98844400 |
| C                             | 2.03966800  | -0.21364700 | -0.22610200 |
| C                             | 0.64836600  | -0.36406100 | -0.33774500 |
| C                             | 0.09410900  | -1.35605700 | -1.20977800 |
| C                             | 0.92482700  | -2.20559200 | -1.92903100 |
| C                             | 2.30704000  | -2.06542500 | -1.80936000 |
| H                             | 6.55537700  | 2.86797100  | 2.05410700  |
| H                             | 4.08081000  | 2.59940000  | 1.99820900  |
| H                             | 6.93888900  | -0.44238200 | -0.66477300 |
| H                             | 7.99024600  | 1.34440300  | 0.71762800  |
| H                             | 0.48952400  | -2.95464200 | -2.58010900 |
| H                             | 2.97319000  | -2.71094300 | -2.36714700 |
| O                             | -0.27818000 | 0.35324200  | 0.28683900  |
| O                             | 1.96887500  | 1.59313100  | 1.32659500  |
| O                             | -1.23531000 | -1.37012600 | -1.27349200 |
| Zr                            | -2.31038100 | 0.05846900  | -0.14076400 |
| O                             | -3.82794000 | -0.57324600 | -1.62947500 |
| H                             | -3.51990400 | -1.05234000 | -2.40611800 |

|   |             |             |             |
|---|-------------|-------------|-------------|
| O | 5.06838700  | -1.75556800 | -1.58710800 |
| C | -4.18937400 | -2.96054600 | 1.94423000  |
| H | -4.38891600 | -3.68228200 | 2.74094500  |
| H | -3.86490300 | -3.50706000 | 1.05427000  |
| H | -5.11972600 | -2.43781900 | 1.71146500  |
| C | -3.11307900 | -1.97052000 | 2.38209900  |
| H | -3.46430900 | -1.43299900 | 3.27128500  |
| C | -1.78189400 | -2.64600300 | 2.70193000  |
| H | -1.40870900 | -3.18624200 | 1.82729500  |
| H | -1.03566900 | -1.90512600 | 2.99749300  |
| H | -1.90374900 | -3.35807400 | 3.52270800  |
| O | -2.92725000 | -0.99465500 | 1.36136200  |
| C | -5.56579300 | 2.49880900  | -0.42249600 |
| H | -6.15333100 | 3.40961300  | -0.27881000 |
| H | -5.50211000 | 1.97808700  | 0.53828300  |
| H | -6.10155100 | 1.85843000  | -1.12764300 |
| C | -4.17330900 | 2.84134200  | -0.94730300 |
| H | -4.27413800 | 3.36856800  | -1.90316700 |
| C | -3.38028700 | 3.71724100  | 0.01652800  |
| H | -3.27166800 | 3.22514100  | 0.98882100  |
| H | -2.38480800 | 3.92648100  | -0.38189800 |
| H | -3.89176300 | 4.66992200  | 0.17618100  |
| O | -3.42806600 | 1.64124500  | -1.22174100 |
| H | -3.89081800 | 0.64254400  | -1.71214200 |

Zr-AZN<sub>1,2</sub>(TS3'')

|   |            |             |             |
|---|------------|-------------|-------------|
| C | 5.91277200 | 3.30703600  | 1.82389300  |
| C | 4.67076400 | 2.71533300  | 1.62806600  |
| C | 4.53489200 | 1.61498200  | 0.77481900  |
| C | 5.66647200 | 1.11077300  | 0.11559400  |
| C | 6.91395900 | 1.71188200  | 0.31655700  |
| C | 7.03885600 | 2.80407000  | 1.16575500  |
| C | 3.17337000 | 1.00726700  | 0.59180500  |
| C | 5.55856700 | -0.06104100 | -0.79934400 |
| C | 4.22743600 | -0.66348200 | -0.97998500 |
| C | 3.06471700 | -0.15497100 | -0.31069300 |
| C | 1.83030500 | -0.79558100 | -0.54067900 |
| C | 1.76207400 | -1.92880600 | -1.42744600 |
| C | 2.90755400 | -2.39519700 | -2.06488000 |
| C | 4.12618400 | -1.75962400 | -1.83390600 |
| H | 6.00751500 | 4.15895300  | 2.48743900  |
| H | 3.78725800 | 3.09059000  | 2.12851600  |
| H | 7.77170000 | 1.30499900  | -0.20400200 |
| H | 8.00801500 | 3.26514500  | 1.31766300  |
| H | 2.83660700 | -3.24827300 | -2.73036300 |
| H | 5.02827000 | -2.11061600 | -2.31885800 |
| O | 0.66782700 | -0.46146300 | -0.01630700 |

|    |             |             |             |
|----|-------------|-------------|-------------|
| O  | 2.22170100  | 1.49792100  | 1.19246000  |
| O  | 0.56059800  | -2.45237000 | -1.56826400 |
| Zr | -1.10666400 | -1.58755500 | -0.43724800 |
| O  | 6.56131900  | -0.49106800 | -1.37143600 |
| C  | -1.05434500 | -5.34810900 | 1.14576000  |
| H  | -0.96126700 | -6.17877500 | 1.85085900  |
| H  | -0.27614900 | -5.45142400 | 0.38413700  |
| H  | -2.02925100 | -5.41922200 | 0.65751800  |
| C  | -0.91362100 | -4.01014000 | 1.87098200  |
| H  | -1.70104200 | -3.94018400 | 2.63387000  |
| C  | 0.44397900  | -3.85279800 | 2.55439200  |
| H  | 1.25024600  | -3.92135300 | 1.81848600  |
| H  | 0.51125000  | -2.88263000 | 3.05167000  |
| H  | 0.58981100  | -4.63615400 | 3.30350500  |
| O  | -1.11628300 | -2.94682500 | 0.95832700  |
| C  | -5.38173600 | -0.25998900 | -0.84016100 |
| H  | -6.11163700 | 0.17082700  | -0.15270300 |
| H  | -5.91586300 | -0.91348600 | -1.53815800 |
| H  | -4.90653600 | 0.53347500  | -1.41633300 |
| C  | -4.33862200 | -1.09627900 | -0.11038800 |
| H  | -3.89919200 | -0.22134600 | 0.82669100  |
| C  | -4.90545500 | -2.20049800 | 0.77231600  |
| H  | -5.39874100 | -2.93073500 | 0.12202500  |
| H  | -4.11087400 | -2.71198200 | 1.31484200  |
| H  | -5.64615400 | -1.81861900 | 1.47678400  |
| O  | -3.26379700 | -1.38290900 | -0.79230700 |
| C  | -3.01022700 | -0.37382400 | 2.84554000  |
| H  | -3.99989000 | -0.23751500 | 3.28529700  |
| H  | -2.26950100 | 0.06282000  | 3.52277000  |
| H  | -2.79261900 | -1.43684400 | 2.74922300  |
| C  | -2.88549600 | 0.32918100  | 1.49878800  |
| C  | -3.27910200 | 1.81024300  | 1.53690900  |
| H  | -4.31386900 | 1.90387700  | 1.87654100  |
| H  | -2.66026300 | 2.27384900  | 2.31314000  |
| C  | -3.06292800 | 2.55603300  | 0.22496200  |
| H  | -3.77299000 | 2.25219400  | -0.54651500 |
| H  | -2.06804800 | 2.32938800  | -0.16995300 |
| O  | -1.83601700 | 0.03232200  | 0.78115300  |
| C  | -3.15504900 | 4.05780900  | 0.38254500  |
| O  | -3.14600400 | 4.65832000  | 1.43357800  |
| O  | -3.23116100 | 4.66142000  | -0.81601200 |
| C  | -3.27956900 | 6.11482700  | -0.81787300 |
| H  | -4.15145400 | 6.43364200  | -0.24319700 |
| H  | -2.38550400 | 6.49254900  | -0.31783900 |
| C  | -3.35537600 | 6.56537800  | -2.26121100 |
| H  | -4.25186500 | 6.17310100  | -2.74643800 |

|                               |             |             |             |
|-------------------------------|-------------|-------------|-------------|
| H                             | -3.39220300 | 7.65664100  | -2.30280200 |
| H                             | -2.47966400 | 6.23006000  | -2.82121400 |
| O                             | -1.77111800 | -3.13861900 | -2.06693800 |
| H                             | -2.52487800 | -3.72323600 | -1.92870000 |
| H                             | -0.99772000 | -3.66006400 | -2.32549000 |
| O                             | -1.26095200 | -0.11058000 | -2.31278700 |
| H                             | -2.16787500 | 0.19026700  | -2.45368500 |
| H                             | -0.69025000 | 0.66626400  | -2.35928000 |
| Zr-AZN <sub>1,2</sub> (TS4'') |             |             |             |
| C                             | 7.79935100  | 0.37571600  | 1.54218100  |
| C                             | 6.46012600  | 0.73416900  | 1.44606400  |
| C                             | 5.58437100  | -0.00214300 | 0.64142300  |
| C                             | 6.06865600  | -1.11127400 | -0.07124400 |
| C                             | 7.41806400  | -1.46568600 | 0.03068400  |
| C                             | 8.28041200  | -0.72782400 | 0.83205600  |
| C                             | 4.14691000  | 0.41845200  | 0.56429900  |
| C                             | 5.16563300  | -1.92264500 | -0.93861100 |
| C                             | 3.75201200  | -1.51361900 | -1.01911100 |
| C                             | 3.25596100  | -0.38165300 | -0.29674200 |
| C                             | 1.89429000  | -0.06087700 | -0.42690800 |
| C                             | 1.03441800  | -0.84989300 | -1.26223600 |
| C                             | 1.54448400  | -1.94312000 | -1.95318600 |
| C                             | 2.89692200  | -2.26325100 | -1.82392000 |
| H                             | 8.47023100  | 0.95270400  | 2.16818100  |
| H                             | 6.06895800  | 1.58537700  | 1.98853100  |
| H                             | 7.76881100  | -2.32423800 | -0.52781100 |
| H                             | 9.32477000  | -1.00820300 | 0.90612500  |
| H                             | 0.88665900  | -2.53389800 | -2.58013300 |
| H                             | 3.31056900  | -3.11186200 | -2.35381300 |
| O                             | 1.27491900  | 0.94191000  | 0.16298200  |
| O                             | 3.77175500  | 1.39514300  | 1.20900200  |
| O                             | -0.22870000 | -0.44629300 | -1.30960100 |
| Zr                            | -0.83077900 | 1.24099700  | -0.14596900 |
| O                             | 5.60639000  | -2.89258400 | -1.55430500 |
| C                             | -0.51719800 | 0.44303800  | 3.77300600  |
| H                             | -0.44098000 | -0.13133200 | 4.70032900  |
| H                             | -0.97147400 | 1.41102200  | 4.00554700  |
| H                             | 0.49199200  | 0.61151200  | 3.39099200  |
| C                             | -1.36280300 | -0.31075700 | 2.74737900  |
| H                             | -0.88528000 | -1.27723200 | 2.54008200  |
| C                             | -2.78693800 | -0.56087500 | 3.23832700  |
| H                             | -3.29409700 | 0.38788200  | 3.43580600  |
| H                             | -3.36321600 | -1.11486400 | 2.49449300  |
| H                             | -2.77296100 | -1.14413000 | 4.16332600  |
| O                             | -1.39787800 | 0.41133200  | 1.52408300  |
| H                             | -4.36137900 | 0.66748900  | -2.42111600 |

|   |             |             |             |
|---|-------------|-------------|-------------|
| C | -2.62754600 | 0.50215200  | -3.68076100 |
| H | -3.16610000 | 0.02774200  | -4.50606400 |
| H | -1.61530200 | 0.09380300  | -3.64222500 |
| H | -2.56755200 | 1.57369500  | -3.88754700 |
| C | -3.34754400 | 0.25044400  | -2.35769600 |
| C | -3.45300100 | -1.24038100 | -2.03066200 |
| H | -3.94090600 | -1.74667700 | -2.86937000 |
| H | -2.44399800 | -1.64959900 | -1.94663400 |
| C | -4.23007100 | -1.50530400 | -0.74381900 |
| H | -5.26001000 | -1.13867800 | -0.81579100 |
| H | -3.77695100 | -0.96151300 | 0.08955700  |
| O | -2.69733600 | 0.93780600  | -1.28092900 |
| C | -4.28824200 | -2.96610500 | -0.36230900 |
| O | -3.76396800 | -3.87724000 | -0.96287700 |
| O | -5.01030300 | -3.14239800 | 0.76186400  |
| C | -5.15165900 | -4.50577500 | 1.24402800  |
| H | -5.58801300 | -5.11248200 | 0.44802200  |
| H | -4.15860100 | -4.90159700 | 1.46690500  |
| C | -6.03486100 | -4.46671600 | 2.47334900  |
| H | -7.01837400 | -4.05639700 | 2.23378900  |
| H | -6.17038700 | -5.48011100 | 2.85913300  |
| H | -5.58502000 | -3.85783500 | 3.26064500  |
| C | -3.36595500 | 5.12178800  | -0.64777500 |
| H | -3.80224300 | 5.95497900  | -0.08965000 |
| H | -4.13194100 | 4.71813000  | -1.31706500 |
| H | -2.54438800 | 5.50777000  | -1.25587300 |
| C | -2.86385100 | 4.03623400  | 0.30225500  |
| H | -2.09128300 | 4.47166600  | 0.94705600  |
| C | -3.97859200 | 3.46931300  | 1.17995700  |
| H | -4.77102900 | 3.03535900  | 0.56216000  |
| H | -3.59322600 | 2.69024500  | 1.84149900  |
| H | -4.42061200 | 4.25655800  | 1.79693300  |
| O | -2.23555700 | 2.99973600  | -0.46122200 |
| H | -2.83687100 | 2.09646800  | -1.01620600 |
| O | 0.22952500  | 2.99784000  | 1.03693000  |
| H | -0.08147000 | 3.30969600  | 1.89480300  |
| H | 1.11835400  | 2.61584800  | 1.15727900  |
| O | -0.03595000 | 2.56882000  | -1.96666400 |
| H | -0.70892400 | 3.23982500  | -2.14895500 |
| H | 0.29011100  | 2.22998000  | -2.80846300 |
